# Supplementary material for: Jovian non-thermal radio emission observed by STEREO/WAVES
Source: MDPI journal article supplement (doi:10.3390/antiox11030516), 2009-04-01
Supplement: s1 [file s1]

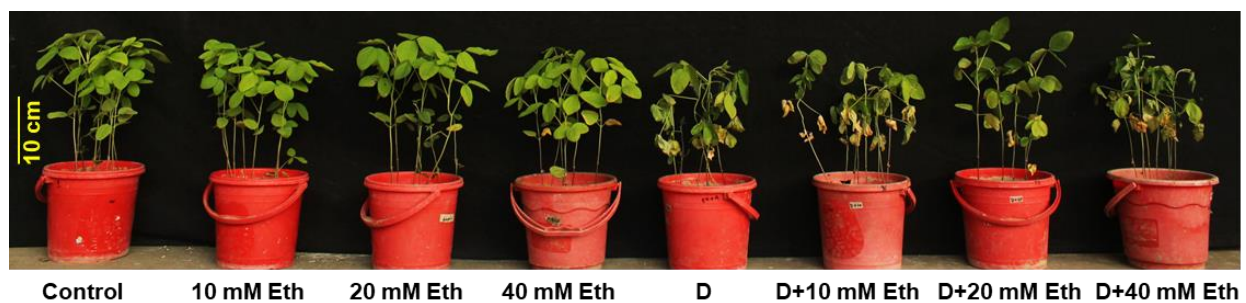

**Supplementary Figure S1.** Effect of different concentrations of exogenous ethanol on soybean plants subjected to drought stress for a period of 8 days. D, drought; Eth, ethanol.
